# Simple statistical identification and removal of contaminant sequences in marker-gene and metagenomics data

Nicole M. Davis<sup>1</sup>, Diana Proctor<sup>2,6</sup>, Susan P. Holmes<sup>3</sup>, David A. Relman<sup>1,2,4\*</sup>, Benjamin J. Callahan<sup>5\*^</sup>

\* Equal contributions

^ Corresponding: [benjamin.j.callahan@gmail.com](mailto:benjamin.j.callahan@gmail.com)

1. Department of Microbiology and Immunology, Stanford University School of Medicine, Stanford, CA 94305

2. Department of Medicine, Stanford University School of Medicine, Stanford, CA 94305

3. Department of Statistics, Stanford University, Stanford, CA 94305

4. Infectious Diseases Section, Veterans Affairs Palo Alto Health Care System, Palo Alto, CA 94304

5. Department of Population Health and Pathobiology, College of Veterinary Medicine, North Carolina State University, Raleigh, NC 27607

6. Department of Orofacial Sciences, University of California, San Francisco School of Dentistry, San Francisco, CA 94143

# Simple statistical identification and removal of contaminant sequences in marker-gene and metagenomics data

## Abstract

The accuracy of microbial community surveys based on marker-gene and metagenomic sequencing (MGS) suffers from the presence of contaminants — DNA sequences not truly present in the sample. Contaminants come from a variety of sources, including reagents. Appropriate laboratory practices can reduce contamination in MGS data, but do not eliminate it. Here we introduce `decontam` (<https://github.com/benjjneb/decontam>), an open-source R package which implements a statistical classification procedure for identifying contaminants in MGS data. Contaminants are identified on the basis of two widely reproduced signatures: contaminants are more frequent in low-concentration samples, and are often found in negative controls. In a dataset from the human oral microbiome, the classification of amplicon sequence variants by `decontam` was strongly consistent with prior microscopic observations of microbial taxa in that environment. In both metagenomics and marker-gene measurements of a mock community dilution series, the removal of contaminants identified by `decontam` substantially reduced technical variation due to differences in reagents and sequencing centers. The application of `decontam` to two recently published datasets corroborated and extended their conclusions that little evidence existed for an indigenous placenta microbiome, and that some low-frequency taxa seemingly associated with preterm birth were run-specific contaminants. `decontam` integrates easily with existing MGS workflows, and allows researchers to generate more accurate profiles of microbial community composition at little to no additional cost.

Simple statistical identification and removal of contaminant sequences in marker-gene and metagenomics data

# Introduction

High-throughput sequencing of DNA from environmental samples is a powerful tool for investigating microbial and non-microbial communities. Community composition can be characterized by sequencing taxonomically informative marker genes, such as the 16S rRNA gene in bacteria (Fox *et al.* 1980, Eckburg *et al.* 2005, Turnbaugh *et al.* 2009, Ravel *et al.* 2011). Shotgun metagenomics, in which all DNA recovered from a sample is sequenced, can also characterize functional potential (Riesenfeld *et al.* 2004, Gill *et al.* 2006, Anantharaman *et al.* 2016). However, the accuracy of marker-gene and metagenomic sequencing (MGS) is limited in practice by several processes that introduce contaminants into the data, i.e. artefactual DNA sequences that are not truly present in the sampled community.

Failure to account for DNA contamination can result in inaccurate data interpretation. Contamination falsely inflates within-sample diversity (Jervis-Bardy *et al.* 2015, Jouselin *et al.* 2015), obscures differences between samples (Adams *et al.* 2015, Jervis-Bardy *et al.* 2015), and interferes with comparisons across studies (Adams *et al.* 2015, Sinha *et al.* 2015). Contaminating DNA competes with sample DNA for PCR and sequencing reagents (Salter *et al.* 2014). In samples with less endogenous sample DNA, contaminants are more likely to comprise a significant fraction of sequencing reads (Glassing *et al.* 2016). As a result, DNA contamination disproportionately affects samples from low-biomass environments (Riley *et al.* 2013, Salter *et al.* 2014, Lauder *et al.* 2014, Lusk 2014, Adams *et al.* 2015), and can lead to controversial claims about the presence of bacteria in low microbial biomass environments like blood and body tissues (Riley *et al.* 2013, Aagaard *et al.* 2014, Lusk 2014, Lauder *et al.* 2016, Glassing *et al.* 2016). In high-biomass environments, contaminants can comprise a significant portion of the low-frequency sequences in the data (Edgar 2016), limiting reliable resolution of low-frequency

Simple statistical identification and removal of contaminant sequences in marker-gene and metagenomics data

variants and contributing to false-positive associations in exploratory analyses (Callahan & DiGiulio *et al.* 2017).

Attempts to control DNA contamination before and after sequencing have had mixed success. One common practice is to process reagent-only (Salter *et al.* 2014, Jouselin *et al.* 2014) or blank sampling instrument (Bittinger *et al.* 2014) negative control samples alongside biological samples at the DNA extraction and PCR steps. Contamination is often assumed to be absent if control samples do not yield a band on an agarose gel (e.g. Herrera & Cockell 2007, Koren *et al.* 2011). However, samples that contain DNA concentrations too low to be visualized by gel electrophoresis still generate non-negligible numbers of sequencing reads (Salter *et al.* 2014, Lauder *et al.* 2016), which suggests that gel-based quality control is insufficient.

There are multiple sources of contaminating DNA in MGS experiments. These include research subjects' or investigators' bodies (Kitchin *et al.* 1990, Meadow *et al.* 2015), sample collection instruments and laboratory reagents (Salter *et al.* 2014, Jouselin *et al.* 2015, Glassing *et al.* 2016), laboratory surfaces and air (Knights *et al.* 2011, Bittinger *et al.* 2014, Adams *et al.* 2015), and other samples within the same sample processing cohort (Jouselin *et al.* 2015). Investigators can reduce the impact of some of these sources of contamination through laboratory techniques such as UV irradiating reagents and lab surfaces, enzymatically treating reagents, the use of "ultrapure" reagents, and separating pre- and post-PCR areas (Rand *et al.* 1990, Patel *et al.* 2012, Jouselin *et al.* 2015, Glassing *et al.* 2016). However, adherence to these recommended lab practices reduces, but does not eliminate, DNA contamination (Salter *et al.* 2014, Sinha *et al.* 2015).

*In silico* removal of contaminants after sequencing complements laboratory approaches to reducing contamination. However, distinguishing contaminating microbial DNA from microbial

## Simple statistical identification and removal of contaminant sequences in marker-gene and metagenomics data

sequences truly present in the sampled community (Salter *et al.* 2014, Lusk 2014) can be difficult, and most researchers do not use *in silico* methods to identify and remove DNA contaminants present in datasets after sequencing. Perhaps the most common *in silico* decontamination method is the removal of sequences that fall below an *ad hoc* abundance threshold (Flores *et al.* 2010, Bittinger *et al.* 2014, Willner *et al.* 2012, Lazarevic *et al.* 2016). However, the removal of rare sequences also removes rare features truly present in the sample, and fails to remove abundant contaminants that are most likely to interfere with subsequent analysis. Another approach is the removal of sequences that appear in negative controls (e.g. Dunn *et al.* 2013, Adams *et al.* 2015). However, this approach is often too stringent because cross-contamination between samples causes abundant true sequences to be detected in negative controls (Callahan & DiGiulio *et al.*, 2017, Jousset *et al.* 2015). Finally, some investigators implement blacklist methods, which exclude sequences or taxa that have been previously identified as contaminants. This approach can be useful, but fails to identify rare or study-specific contaminants, and removes true members of the sampled community that overlap with previously observed contaminants.

To our knowledge, only two software tools have been developed that directly address the problem of contamination in MGS data. SourceTracker uses Bayesian mixture models to identify the proportion of a sample that is consistent with origin from a contaminating source of known composition, but does not identify specific contaminant sequences (Knights *et al.* 2011). A workflow in the An'vivo software package leverages the visualization and summary statistics provided by An'vivo to better partition metagenomic data into genomic bins and identify contaminant metagenome-assembled-genomes (MAGs) (Delmont & Eren 2016), but does not apply to marker-gene data and relies on user expertise to identify contaminant-specific patterns.

## Simple statistical identification and removal of contaminant sequences in marker-gene and metagenomics data

Here, we introduce *decontam*, a simple-to-use and open-source R package that identifies and removes contaminants in MGS data. *decontam* implements two simple statistical tests based on widely reproduced signatures of contamination: (1) Sequences from contaminating taxa are likely to have *frequencies* that inversely correlate with sample DNA concentration (Willner *et al.* 2012, Lusk 2014, Salter *et al.* 2014, Jervis-Bardy *et al.* 2015), and (2) sequences from contaminating taxa are likely to have higher *prevalence* in control samples than in true samples (Dunn *et al.* 2013, Adams *et al.* 2015, Lazarevic *et al.* 2016). Detection of these signatures can be readily integrated with current best practices. Frequency-based contaminant identification relies on auxiliary data from DNA quantitation that is in most cases intrinsic to MGS sample preparation, while prevalence-based contaminant identification relies on data from sequenced negative controls, a recommended practice in MGS studies (Salter *et al.* 2014, Sinha *et al.* 2015) that can be easily and cheaply performed.

We validated *decontam* on marker-gene and metagenomics datasets generated by our laboratory and others. In an oral 16S rRNA gene dataset, *decontam* identified low- and high-frequency contaminants consistent with curated databases of common contaminating microbial genera and known oral microbes. In data generated by Salter *et al.*, the removal of contaminants identified by *decontam* reduced technical variation due to sequencing center in marker-gene data, and reduced technical variation due to DNA extraction kit in shotgun metagenomics data. The application of *decontam* to data generated by Lauder *et al.* corroborated their conclusion that there was no evidence for a placenta microbiome in their 16S rRNA gene sequencing data. Finally, *decontam* improved the exploratory analysis of associations between preterm birth and the vaginal microbiota by removing run-specific contaminants from the marker-gene data analyzed in a recent study (Callahan & DiGiulio *et al.* 2017). Our results suggest that *decontam*

Simple statistical identification and removal of contaminant sequences in marker-gene and metagenomics data

can improve the accuracy of biological inferences across a wide variety of studies that use MGS methods to investigate microbial communities.

## Description of the Method

### The **decontam** R package

**decontam** is implemented as an open-source R package available from github (<https://github.com/benjjneb/decontam>), and in the future from the Bioconductor repository (Gentleman *et al.* 2004). The primary function, *isContaminant*, uses frequency- and/or prevalence-based patterns across samples to identify contaminant *sequence features* derived from marker-gene or metagenomics sequencing data. Valid sequence features include amplicon sequence variants (ASVs), operational taxonomic units (OTUs), taxonomic groups or phylotypes (e.g. genera), orthologous genes, metagenome-assembled-genomes (MAGs), and any other derived feature with a quantitative per-sample abundance.

The primary input to *isContaminant* is a feature table describing the quantitative abundance of sequence features across samples (e.g. an OTU table). In addition, *isContaminant* requires one of two types of sample metadata for frequency- and prevalence-based contaminant identification, respectively: (1) A vector of DNA concentrations for each sample, often obtained in the form of a fluorescence intensity (e.g. PicoGreen), or (2) a defined set of sequenced negative control samples, preferably DNA extraction controls to which no sample DNA was added. Contaminants identified by **decontam** can then be removed with basic R functions.

### Frequency-based contaminant identification.

# Simple statistical identification and removal of contaminant sequences in marker-gene and metagenomics data

Total DNA (T) in a sample is assumed to consist of a mixture of contaminating DNA (C) that is present in uniform concentration across samples (Salter *et al.* 2014, Lazarevic *et al.* 2016, Lauder *et al.* 2016) and true sample DNA (S) that is present in varying concentration across samples. In the limit of  $S \gg C$ , the frequency of contaminating DNA ( $f_C$ ) is inversely proportional to the total DNA (Jervis-Bardy *et al.* 2015, see also Fig. 1a), while the frequency of true sample DNA ( $f_S$ ) is independent of total DNA:

$$f_C = C/(C+S) \sim 1/T \quad f_S = S/(C+S) \sim 1$$

Sequence features are classified by comparing a “contaminant” model, in which expected feature frequency is constrained to vary inversely with total DNA concentration, to a “non-contaminant” model, in which expected feature frequency is constrained to be independent of total DNA concentration. More precisely, two linear models of the log-transformed frequencies as a function of the total DNA concentration are fit over all samples in which the feature is present, a contaminant model with the slope set to -1 and a non-contaminant model with the slope set to 0. An F statistic is computed from the ratio between the sums-of-squares of the residuals of the contaminant model and the non-contaminant model, and then the tail probability that a small or smaller F statistic would have occurred by chance is calculated. Small probabilities indicate that the contaminant model is a significantly better fit than the non-contaminant model.

When contaminants comprise a large fraction or majority of sequencing reads (i.e.  $C \sim S$  or  $C > S$ ), these simple approximations for the dependence of contaminant frequency on DNA concentration break down. Thus, the frequency-based method is not recommended for the inverse problem of identifying non-contaminant sequences in extremely low-biomass samples.



Simple statistical identification and removal of contaminant sequences in marker-gene and metagenomics data

## Prevalence-based contaminant identification

Contaminants are expected to occur in a higher proportion of negative control samples than in true samples (see Fig. 1b). For each sequence feature, a chi-square statistic on the 2x2 contingency table of presence/absence in true samples and in negative controls is computed. If there are too few samples for the chi-squared approximation, Fisher's exact test is used instead. Extreme probabilities for the estimated statistic indicate that the null hypothesis is unlikely, i.e. the sequence feature is significantly more prevalent in negative control samples.

## Sequencing Batches and Composite Identification

Batches of samples that were processed separately may have different contaminant spectra (Patel *et al.* 2012, Goodrich *et al.* 2014, Salter *et al.* 2014, Glassing *et al.* 2016). These batches can be specified by the user, in which case probabilities are generated from each batch independently, and combined in a user-selectable fashion for classification. In addition, decontam provides simple methods to combine the probabilities generated by the frequency and prevalence approaches into a composite probability.

## Classification

Binary classification of a sequence feature as contaminant or non-contaminant is performed by comparing its associated probability  $P$  to a user-defined threshold  $P^*$ , where  $P$  can be the frequency, prevalence, or composite probability. If  $P < P^*$ , the sequence feature is classified as a contaminant. The default classification threshold is  $P^*=0.1$ , but  $P^*$  should be adjusted based on specific dataset characteristics and the desired balance between false-positives and false-negatives (see also Discussion). When the special value  $P^*=0.5$  is selected, all

## Simple statistical identification and removal of contaminant sequences in marker-gene and metagenomics data

sequence features that are more similar to the contaminant model than the non-contaminant model will be classified as contaminants. In the “prevalence” approach  $P^*=0.5$  is particularly simple to interpret: sequence features are classified as contaminants if present in a higher fraction of negative control samples than in true samples (Figure 1b).

## Results

### Different frequency patterns in 16S rRNA gene sequences from the human oral mucosa.

Previous studies have shown that contamination can significantly impact MGS analyses of human-associated microbial communities (Salter *et al.* 2014, Jarvis-Bardy *et al.* 2015). To investigate contamination in an ongoing study of the human oral microbiome, we processed 33 reagent-only or blank-swab DNA extraction negative control samples alongside and in the same manner as 712 oral mucosa samples.

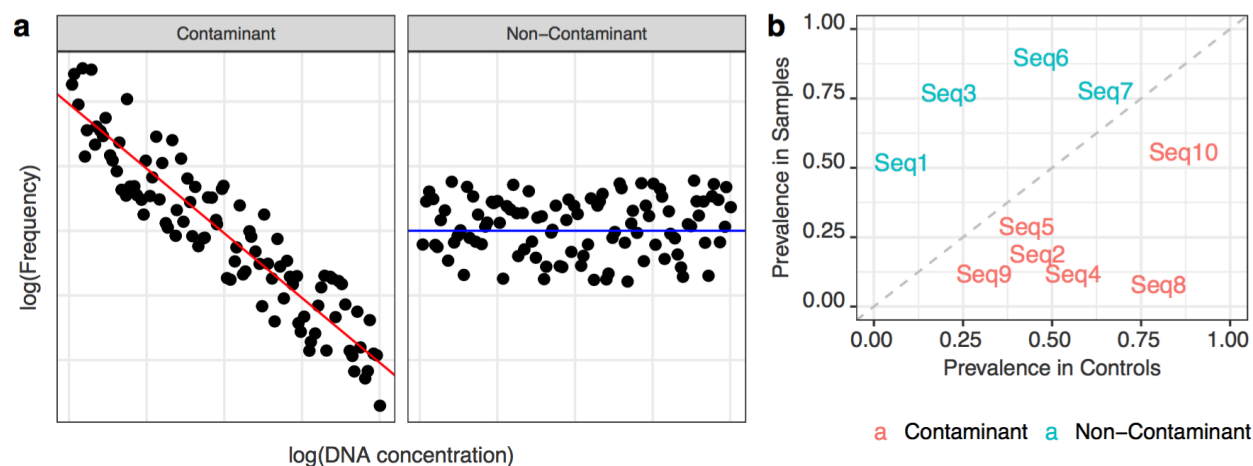

**Figure 1. Expected patterns of contaminants and non-contaminants. (a)** Theoretical frequencies of sequences across samples; expected contaminant frequency varies inversely with sample DNA concentration (red), while expected non-contaminant frequency does not (blue). **(b)** Theoretical prevalence of multiple contaminant and non-contaminant sequences in samples and negative controls. Sequences below the dotted line are more prevalent in controls than true samples, and are likely contaminants.

## Simple statistical identification and removal of contaminant sequences in marker-gene and metagenomics data

We inspected the resulting frequencies of amplicon sequence variants (ASVs) as a function of the concentration of DNA measured in each sample after PCR and prior to sequencing. Two clear patterns emerged (Fig. 2a): ASV frequencies independent of DNA concentration, e.g. Seq1, Seq12, Seq200; and ASV frequencies inversely proportional to DNA concentration, a pattern previously reported to be characteristic of contamination (Lusk 2014, Jervis-Bardy *et al.* 2015, Salter *et al.* 2014), e.g. Seq3, Seq152, and Seq53. Taxonomic assignments for ASVs with inverse frequency patterns were largely consistent with contamination: Seq3 was a fungal mitochondrial DNA sequence, while Seq53 and Seq152 were assigned to the commonly contaminating genera *Methylobacterium* and *Phyllobacterium*, respectively (Salter *et al.* 2014; Jervis-Bardy *et al.* 2015; Glassing *et al.* 2016; Lauder *et al.* 2016). In contrast, selected ASVs with frequencies independent of sample DNA concentration were consistent with membership in the oral microbiota (Fig. 2a): Seq1, *Streptococcus sp.*; Seq12, *Neisseria sp.*, and Seq200, *Treponema sp.* (Bik *et al.* 2010, Valm *et al.* 2011, Eren *et al.* 2014, Mark Welch *et al.* 2016).

### **decontam discriminates likely contaminating sequences from likely oral sequences**

We applied the *isContaminant* function to all ASVs present in two or more samples in our oral mucosa dataset, selecting the “combined” method which makes use of both frequency and prevalence approaches. The resulting probability distribution was bimodal, with peaks near 0 and 1 (Fig. 2b). Most ASVs (Fig. 2b) and an even larger majority of total reads (Fig. S2) were assigned high probabilities.

## Simple statistical identification and removal of contaminant sequences in marker-gene and metagenomics data

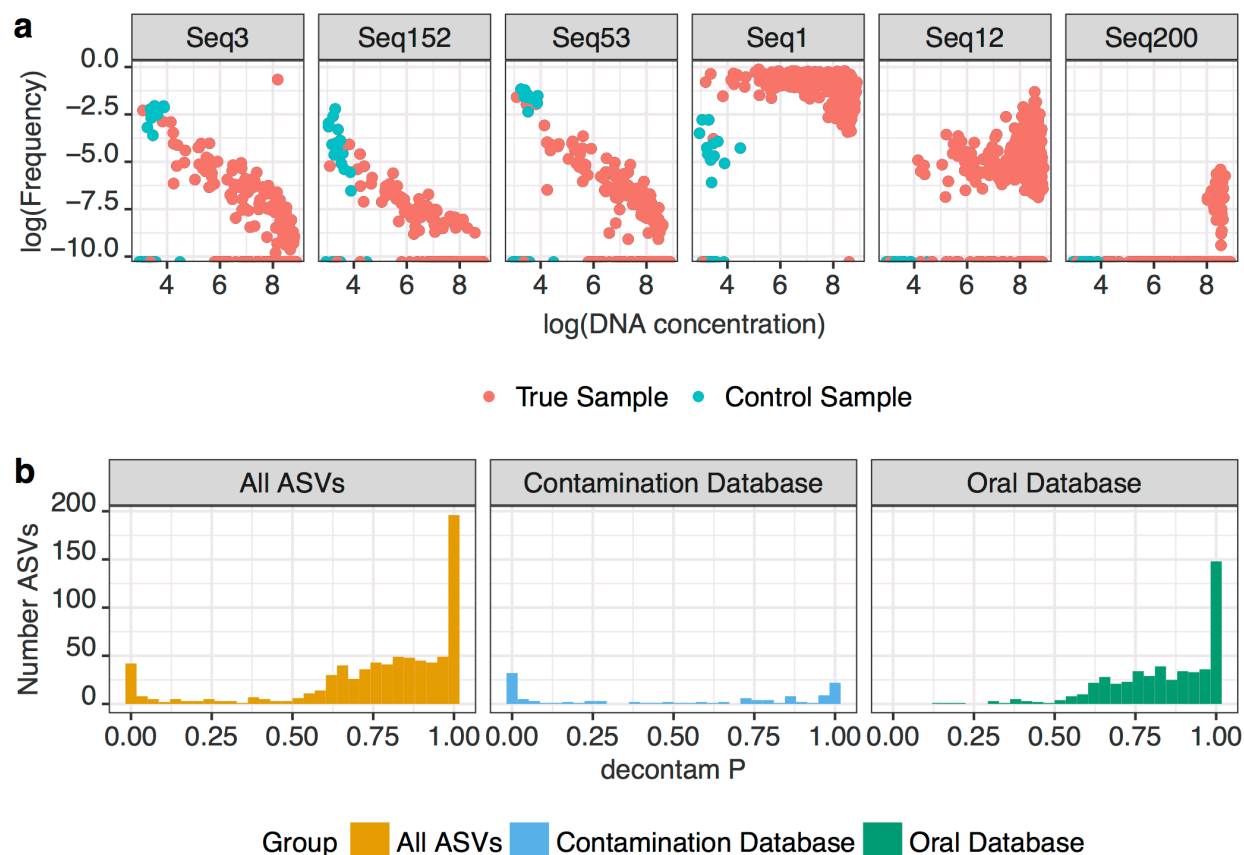

**Figure 2. Frequency and probability distributions of microbial sequences from an oral mucosal 16S rRNA gene dataset.** (a) Frequency patterns of six sequences from a 16S rRNA gene study of human oral microbial communities. The frequencies of sequence variants Seq3, Seq152, and Seq53 vary inversely with sample DNA, a characteristic of contaminants. The frequencies of Seq1, Seq12, and Seq200 are independent of sample DNA concentration, a characteristic of sampled taxa. (b) Probabilities for amplicon sequence variants (ASVs) were computed by the “combined” method of the *isContaminant* function in the decontam R package for all ASVs present in two or more samples (orange), ASVs from genera previously observed as contaminants in negative control samples (blue, Methods) and ASVs from genera known to be members of human oral samples (green, Methods).

To assess the classification accuracy of decontam, we generated two databases to serve as proxies for oral sequences and contaminants (Methods). The oral database contained microbial genera that have been visualized by microscopy in human oral plaque samples. The

## Simple statistical identification and removal of contaminant sequences in marker-gene and metagenomics data

contamination database contained genera previously sequenced from negative control samples in 16S rRNA gene studies. Most ASVs from genera present in the contamination database were assigned probabilities less than 0.5, while most ASVs from genera present in the oral database were assigned probabilities greater than 0.5 (Fig. 2b). These probability differences were more pronounced when accounting for ASV abundances (Fig. S2). These patterns suggest that decontam effectively differentiated contaminants from genera likely to be members of the oral microbiota.

Thirty-three ASVs in the contamination database had probabilities greater than 0.9, indicating that their frequency and prevalence patterns across samples did not provide evidence of contaminant origin. On closer inspection, these 33 putative contaminants belonged to genera that did not appear in our oral database because they have not been visualized in oral plaque samples (Table S1; Methods), but are frequently sequenced from the oral microbiota (Bik *et al.* 2010, Chen *et al.* 2011, Eren *et al.* 2014). This ambiguity illustrates a fundamental limitation of blacklist methods: the removal of taxa previously identified as contaminants can also remove true members of the microbial communities in which those taxa naturally occur.

### **Application of decontam to a dilution-series test dataset.**

Our lack of *a priori* knowledge of the true microbial composition of the oral samples limits the ways we can evaluate the performance of decontam. An alternative approach is to test decontam on samples of known microbial composition. Salter *et al.* generated a 10-fold dilution series extending over five decades from a high-biomass monoculture of *Salmonella bongori*. Aliquots from this dilution series were characterized by 16S rRNA gene sequencing performed at three different sequencing centers, and by shotgun sequencing using four different DNA extraction

## Simple statistical identification and removal of contaminant sequences in marker-gene and metagenomics data

kits (one of which yielded very little DNA and is excluded here). Standard DNA quantitation data were not reported, so the reported 16S qPCR results (Fig. 2 from Salter *et al.* 2014) were used as a proxy for the DNA concentration of each dilution sample. We assume that all non-*S. bongori* sequences represent some form of contamination.

The fraction of non-*S. bongori* sequencing reads classified as contaminants by the frequency method increased as the classification threshold was made less stringent: Over 50% of the putative contaminant amplicon reads and over 80% of the putative contaminant shotgun reads were identified as contaminants at the default threshold  $P^*=0.1$  (Fig. 3). Because the sensitivity of our statistical testing approach is lower for sequence features that appear in only a small number of samples, a much smaller fraction of the unique sequence features (i.e. ASVs in the 16S rRNA gene data and genera in the shotgun data) were identified as contaminants. Identifying contaminants on a per-batch basis was more effective than pooling data across the different sequencing centers and DNA extraction kits, which are expected to have different contaminant spectra (Fig. 3).

# Simple statistical identification and removal of contaminant sequences in marker-gene and metagenomics data

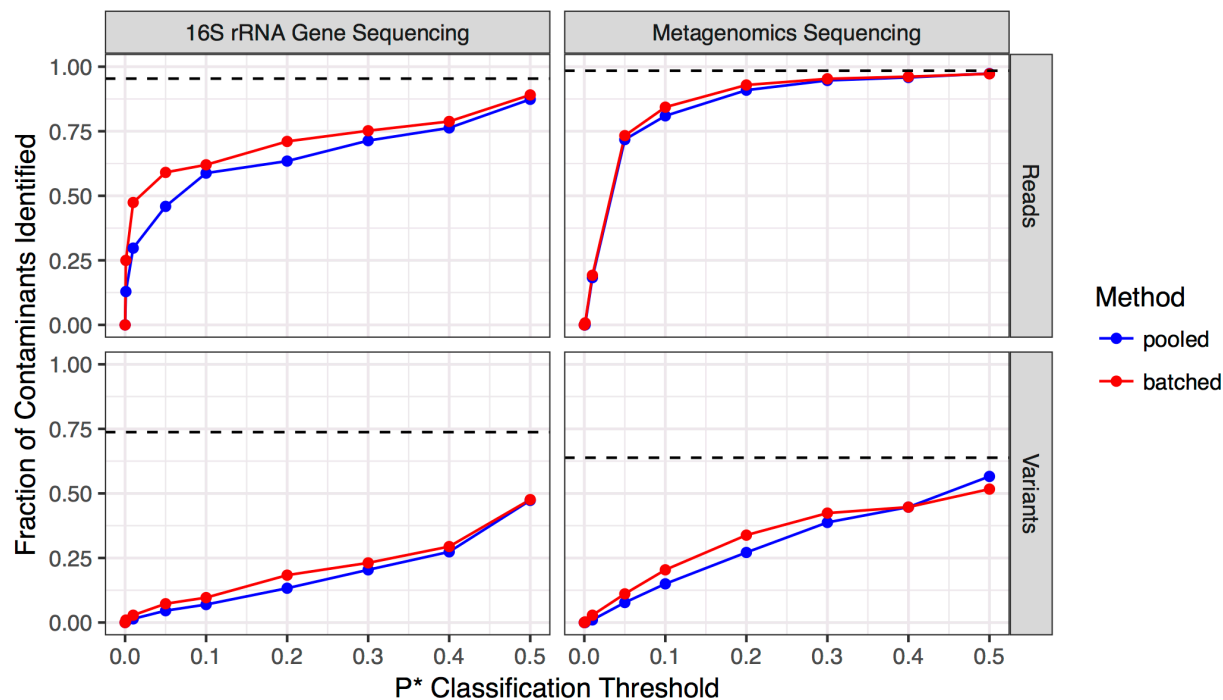

**Figure 3. Proportion of contaminants correctly identified by the frequency method, as a function of the classification threshold.** The frequency method was applied to all data pooled together (blue), and on a per-batch basis (red). Batches were specified as the sequencing centers for the 16S data, and the DNA extraction kits for the shotgun data. The fraction of contaminants identified is evaluated on a per-read basis and on a per-variant basis (ASVs for 16S data, genera for shotgun data). Dashed lines show the maximum possible classifier performance, given that decontam cannot identify contaminants only present in a single sample.

Removal of contaminants that were identified by decontam significantly reduced batch effects between samples processed by different sequencing centers and DNA extraction kits (Fig. 4). As the classification threshold increased from  $P^*=0.0$  (no contaminants removed) to  $P^*=0.1$  (default) to  $P^*=0.5$  (aggressive removal), the multi-dimensional scaling ordination distance between samples from different batches decreased. This effect was most dramatic at the intermediate dilutions where both *S. bongori* and various contaminants made up a significant fraction of the total sequenced DNA, and where decontam almost completely eliminated the

# Simple statistical identification and removal of contaminant sequences in marker-gene and metagenomics data

separation of samples by batch in the ordination. No *S. bongori* sequences were removed by decontam: the probabilities of the *S. bongori* genus and associated ASVs were all > 0.9, well above even the aggressive  $P^*=0.5$  classification threshold.

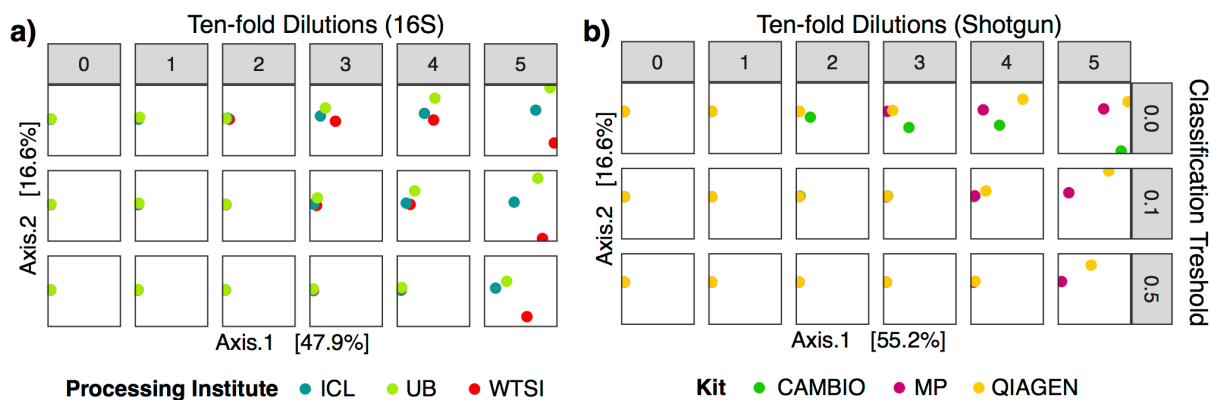

**Figure 4.** Multi-dimensional-scaling (MDS) ordination of sequenced samples of a monoculture of *S. bongori*, as a function of dilution and the contaminant classification threshold. A dilution series of 0, 1, 2, 3, 4, and 5 ten-fold dilutions of a pure culture of *Salmonella bongori* was subjected to 16S rRNA gene sequencing at three sequencing centers, and shotgun sequencing using three different DNA extraction kits. Contaminants were identified by the decontam frequency method with a classification threshold of  $P^*=0.0$  (no contaminants identified),  $P^*=0.1$  (default), and  $P^*=0.5$  (aggressive identification). After contaminant removal, pairwise between-sample Bray-Curtis dissimilarities were calculated, and an MDS ordination was performed. The two dimensions explaining the greatest variation in the data are shown.

The 16S rRNA gene sequencing (but not the shotgun sequencing) data included a negative control from each sequencing center. To test if contaminant classification could be improved by the “prevalence” approach, we grouped the negative control with the two most extreme dilutions to serve as a set of three negative controls (the *S. bongori* culture was diluted to near absence in dilutions 4 and 5). The “prevalence” approach allowed additional contaminants to be identified (Fig. S1), suggesting that combining the frequency and prevalence



Simple statistical identification and removal of contaminant sequences in marker-gene and metagenomics data

approaches is likely optimal when both DNA quantitation data and negative control samples are available.

### **Identification of non-contaminant sequences in a low-biomass environment.**

In very low biomass environments, a majority of the sequence features in MGS data might derive from contaminants rather than sequences truly present in the sampled environment. In such cases, it is preferable to require that sequence features show sufficient statistical evidence that they are *not* contaminants prior to downstream analysis. This alternative approach is naturally supported by switching the null and alternative hypotheses in the “prevalence” approach, and is implemented as the `isNotContaminant` method in the `decontam` R package.

Recently it was proposed that the human placenta is not normally sterile but instead harbors an indigenous microbiota, based largely on evidence from marker-gene sequencing of placental samples (Aagard *et al.* 2014). However, contamination has since been proposed as an alternative explanation of those experimental results (Lauder *et al.* 2016, Perez-Muñoz *et al.* 2017). To examine this question further, Lauder *et al.* performed 16S rRNA gene amplification and sequencing on placenta biopsy samples, as well as a number of negative control samples, using two different DNA extraction kits. Strikingly, samples clustered together by kit rather than by placental or negative control origin, suggesting that most sequences observed in the placenta samples derived from reagent contamination rather than a placenta microbiome.

We applied the `isNotContaminant` method to the data from Lauder *et al.* in an effort to determine if any ASVs in their data were consistent with placental origin, despite being too rare to drive whole-community ordination results. Of 557 ASVs present in at least 5 samples, there were 7 ASVs in which the contaminant model was rejected in favor of the non-contaminant

## Simple statistical identification and removal of contaminant sequences in marker-gene and metagenomics data

model at an FDR threshold of 0.5 (Table 1). However, closer inspection of these ASVs largely rules out the proposed placenta microbiome as a likely source. Five of the 7 ASVs match *Homo sapiens*, and likely arose from off-target amplification of human DNA present in the placenta biopsy. One of the two putative non-contaminant bacterial ASVs is plausibly explained by translocation during delivery, as it was an exact match to the *Lactobacillus crispatus* ASV that was the most abundant ASV in the study as a whole and present in every vaginal sample. The other putative non-contaminant bacterial ASV was a Ruminococcaceae variant, a known member of human gut microbial communities (Eckburg *et al.* 2005).

**Table 1. Amplicon sequence variants from the Lauder *et al.* dataset classified as non-contaminants.** All 557 ASVs were tested using the isNotContaminant function, with 7 ASVs classified as non-contaminants using an FDR threshold of 0.5 (Benjamini & Hochberg). Taxonomy was assigned by BLAST-ing sequences against the nt database. Prevalence is reported for each sample type.

|   | P (adjusted)         | Taxa                | Placenta (n=24) | Negative (n=27) | Saliva (n=12) | Vagina (n=6) |
|---|----------------------|---------------------|-----------------|-----------------|---------------|--------------|
| 1 | $8.1 \times 10^{-6}$ | <i>Homo sapiens</i> | 19              | 0               | 0             | 1            |
| 2 | 0.010                | <i>L. crispatus</i> | 21              | 7               | 7             | 6            |
| 3 | 0.078                | <i>Homo sapiens</i> | 11              | 0               | 0             | 0            |
| 4 | 0.12                 | <i>Homo sapiens</i> | 9               | 0               | 0             | 0            |
| 5 | 0.12                 | <i>Homo sapiens</i> | 9               | 0               | 0             | 0            |
| 6 | 0.32                 | Ruminococcaceae sp. | 8               | 0               | 0             | 0            |
| 7 | 0.32                 | <i>Homo sapiens</i> | 8               | 0               | 0             | 1            |

## Reduction of false-positive associations between the maternal microbiota and preterm birth.

In a recent study, the vaginal microbiota in gestations that ended in preterm birth (PTB) was compared to the microbiota in gestations ending in term birth in two racially distinct cohorts of women (Callahan & DiGiulio *et al.* 2017). Exploratory analysis of the associations between

## Simple statistical identification and removal of contaminant sequences in marker-gene and metagenomics data

increased gestational abundances of various bacterial taxa and PTB identified a number of genera associated with PTB (FDR < 0.1 threshold). However, the authors concluded that many of these statistically significant associations were caused by run-specific contaminants rather than a true biological signal.

We applied the *isContaminant* method to all ASVs in the Callahan & DiGiulio *et al.* dataset, selecting the “combined” method and specifying the sequencing runs as batches. We then generated a plot similar to the exploratory analysis presented in that paper, but in this case coloring ASVs based on the probabilities determined by *isContaminant* (Fig. 5). Four of the ASVs most significantly associated with PTB were assigned probabilities less than  $10^{-6}$ , strongly supporting a contaminant origin. The genera to which these ASVs belong are indicated in the figure, and correspond to genera previously observed as contaminants (*Herbaspirillum*: Barton *et al.* 2006, Salter *et al.* 2014, Glassing *et al.* 2016; *Pseudomonas*: Salter *et al.* 2016, Jousselin *et al.* 2015, Lazarevic *et al.* 2016, Jervis-Bardy *et al.* 2015, Glassing *et al.* 2016; *Tumebacillus*: Glassing *et al.* 2016, Kim & Hofstaedter *et al.* 2017; *Yersinia*: Afshinnkoo *et al.* 2015). Removing likely contaminants reduced reported false-positive associations, and improved the power of the exploratory analysis to detect significant associations in the non-contaminant ASVs by reducing the multiple-hypothesis burden.

# Simple statistical identification and removal of contaminant sequences in marker-gene and metagenomics data

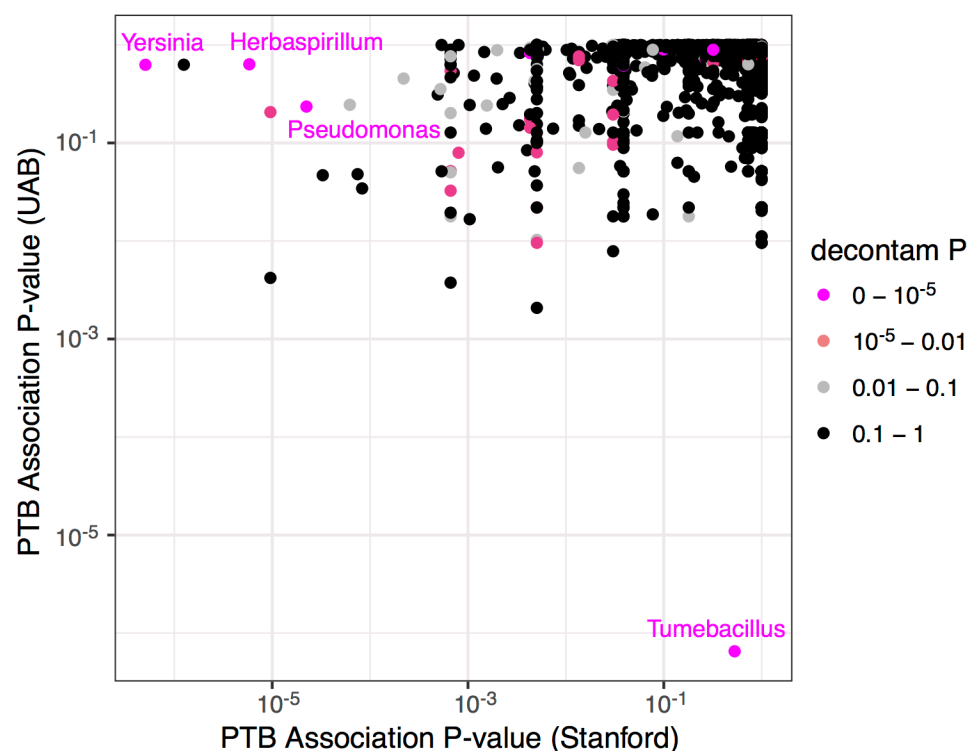

**Figure 5. Diagnosing contamination in an exploratory analysis of the vaginal microbiota and preterm birth (PTB).** (A) The association between PTB and an increase in the average gestational frequency of various ASVs was evaluated in the two cohorts of women (Stanford and UAB) analyzed in Callahan & DiGiulio *et al.* The x- and y-axes display the P values of the association between increased gestational frequency and PTB (one-sided Wilcoxon rank-sum test) in the Stanford and UAB cohorts, respectively. Points are colored by the probability assigned to them by the *isContaminant* function in the *decontam* R package, using the combined method. Several ASVs that are strongly associated with PTB in either the Stanford or UAB cohorts are clearly identified as contaminants with a decontam P value of less than  $10^{-5}$  (genera in magenta text).

Simple statistical identification and removal of contaminant sequences in marker-gene and metagenomics data

## Discussion

Previous studies established two common signatures of microbial contaminants in environmental samples: frequency that is inversely proportional to sample DNA concentration (Willner *et al.* 2012, Lusk 2014, Salter *et al.* 2014, Jervis-Bardy *et al.* 2015), and presence in negative control samples (Dunn *et al.* 2013, Adams *et al.* 2015, Lazarevic *et al.* 2016). Building on that work, we developed a simple model of the mixture between contaminating and sample DNA that serves as the basis of a statistical classification method for identifying contaminants in MGS data. This method is implemented in the open source R software package *decontam*, and can be used to diagnose, identify and remove contaminants in marker-gene and metagenomic sequencing datasets.

We evaluated the accuracy of *decontam* in a 16S rRNA gene survey of the human oral mucosa, and found that classification of contaminants by *decontam* largely agreed with literature expectations for contaminant and oral bacterial genera. Furthermore, *decontam* identified most known contaminant reads in marker-gene and metagenomics datasets generated from a dilution series of a single-species monoculture. Contaminant removal by *decontam* also improved common downstream analyses. When applied to samples of known composition, *decontam* reduced technical variation due to sequencing center and DNA extraction kit, an oft-cited issue in high-throughput 16S rRNA gene survey studies (Kennedy *et al.* 2014, Salter *et al.* 2014, Sinha *et al.* 2015). *decontam* also removed several contaminant taxa from a recent study that a naïve exploratory analysis would have found to be significantly associated with preterm birth (Callahan & DiGiulio *et al.* 2017). Finally, *decontam* corroborated another recent study's conclusion that there was little evidence for a core placenta microbiome in their sequencing data, and extended that conclusion to rare sequences in their dataset (Lauder *et al.* 2016).

## Simple statistical identification and removal of contaminant sequences in marker-gene and metagenomics data

**decontam** makes significant improvements in current approaches to contaminant identification and removal. First, **decontam** identifies contaminants on a per-sequence-feature basis, an approach that is lacking from existing software tools. Second, the statistical classification approach employed by **decontam** avoids several shortcomings of common approaches based on *ad hoc* thresholds. Removal of all sequences detected in negative controls removes abundant true sequences in the presence of cross-contamination among samples (Wright & Vetsigian, 2016, Edgar 2016). Removal of sequences below an abundance-based cutoff sacrifices low-frequency true sequences, and fails to remove abundant contaminants that are the most likely to interfere with downstream analysis. Together these properties make **decontam** a useful tool for improving the quality of MGS data, with positive implications for a wide variety of subsequent analyses.

### Using **decontam**

#### *Experimental design*

**decontam** can be used on any dataset in which DNA quantitation data or sequenced negative control samples are available. However, simple experimental design choices can further improve the performance of **decontam**. Because reagents contribute significantly to contamination (Lusk 2014, Salter *et al.* 2014, Jervis-Bardy *et al.* 2015, Lauder *et al.* 2016), negative control samples containing only reagents or sterile sample collection instruments should be processed and sequenced alongside true biological samples. This will enable use of prevalence-based contaminant identification, which can improve the accuracy of contaminant identification based on frequency alone. Furthermore, because the sensitivity of prevalence-based statistical classification is limited by the number of negative control samples, and because

## Simple statistical identification and removal of contaminant sequences in marker-gene and metagenomics data

there is often variation between the contaminants observed in different negative control samples, we recommend sequencing multiple negative control samples. Inclusion of a positive control dilution series of samples that covers a broad range of input DNA concentrations may also improve frequency-based contaminant identification (Salter *et al.* 2014).

### **Method choice**

decontam implements distinct frequency-based or prevalence-based methods for contaminant identification, and can also be instructed to use both methods in combination. Choice of contaminant identification method will be guided first by the availability of the necessary auxiliary data: frequency-based identification requires DNA quantitation data, and prevalence-based identification requires sequenced negative controls.

Effective frequency-based contaminant identification requires variation in sample DNA concentration. We recommend that DNA concentrations vary over at least a two-fold range. In our experience, sufficient variation in DNA concentration typically arises naturally during sample preparation and processing. The inclusion of a dilution series of a positive control sample, as described in Salter *et al.* 2014, can guarantee a broad range of sample DNA concentrations and may improve the accuracy of frequency-based identification.

The sensitivity of prevalence-based contaminant identification is constrained by the number of sequenced negative control samples, and will have limited power to detect contaminants if few negative control samples are included in the data. In MGS data from very low biomass environments, where contaminant DNA may constitute a large fraction of sequencing reads, the frequency-based identification is not valid and the prevalence-based method implemented in the `isNotContaminant` function is the best choice.

## Simple statistical identification and removal of contaminant sequences in marker-gene and metagenomics data

In our analysis of data from Salter *et al.*, we found that combining the frequency and prevalence approaches was more effective than either method alone. Thus, when both negative controls and DNA quantitation data are available, we recommend using a combination of both methods to identify contaminants. *decontam* provides multiple ways to combine probabilities from the frequency and prevalence methods into a composite probability that can then be used for classification.

### ***Choice of classification threshold***

Sequence features are classified as contaminants by comparing the tail probabilities generated by the selected contaminant identification method to a classification threshold  $P^*$ . The default value of  $P^*=0.1$  separated most expected contaminants from expected oral sequences in our human oral mucosa dataset (100s of samples). In both the oral dataset and in the dilution series from Salter *et al.* (batches of 6 samples), relaxing the threshold to 0.5 identified additional contaminants with little increase in false positives. Meanwhile, in the pregnancy datasets (1000s of samples), likely false-positive contaminant identifications arose at the default threshold of 0.1, and a more appropriate classification threshold was 0.01 to 0.001.

We recommend that users consider non-default classification thresholds, especially when *decontam* is being applied in batch-wise fashion such as in large studies that span multiple sequencing runs. Visualization of the probabilities that will be used for classification can identify an appropriate classification threshold. For example, the histogram of probabilities in Figure 2 showed clear bimodality between very low and high probabilities, indicating that classification thresholds in the range from 0.1 to 0.5 would be effective. A second useful visualization is a



Simple statistical identification and removal of contaminant sequences in marker-gene and metagenomics data

quantile-quantile plot of probabilities versus a uniform distribution (the “expected” probability distribution).

An alternative way to use the probabilities generated by decontam is as quantitative post-hoc diagnostics, rather than as input to a binary classifier. As suggested by Figure 5, consider a case in which several taxa are identified as differentially expressed in a condition of interest. Inspection of the decontam probabilities associated with those taxa will reveal whether there is statistical evidence that they might have arisen from contaminants, informing subsequent interpretation and speaking to the necessity of further analyses to confirm the validity of those associations.

### ***Application to heterogeneous samples***

decontam uses patterns across samples to identify contaminants, but that approach can be less effective when different groups of samples have systematically different contaminant patterns. One such scenario is groups of samples that were processed separately, resulting in different contaminants being introduced in each group. decontam allows the user to specify such “batches” in the data, in which case statistical testing is performed independently within each batch and the most extreme probability across batches is used for contaminant classification. Specification of batches is applicable to studies that span multiple sequencing runs, and should also be considered when other sample processing steps that could introduce contaminants – e.g. differences in DNA extraction kit – differ between groups of samples.

The assumptions of decontam, especially the frequency approach, can also be violated if the methods are applied to groups of samples in which bacterial biomass systematically differs. If, for example, decontam is applied to a set of samples including both stool samples (high

Simple statistical identification and removal of contaminant sequences in marker-gene and metagenomics data

biomass) and airway samples (low biomass), the method might flag real sequences that appear in the airway samples as contaminants, because they appear in a higher frequency in the low-concentration samples. Therefore, we recommend applying decontam independently to groups of samples collected from different environments.

### ***Choice of Sequence Feature***

decontam can be applied to a variety of sequence features derived from MGS data (e.g. OTUs, ASVs, MAGs). decontam should work most effectively on sequence features that are sufficiently resolved such that they do not group contaminants with real strains, while also not being overly affected by noise arising from MGS sequencing.

In marker-gene data, we expect the best performance will be achieved by using post-denoising ASVs as sequence features, as ASVs separate sequence variants to the maximum extent possible and thus are least prone to grouping contaminants with related real strains. A general recommendation for metagenomics studies is to use finer taxonomic groups (e.g. species rather than families) and narrower functional categories (e.g. genes rather than pathways).

### **Limitations of decontam and Complementary Approaches**

decontam assumes that contaminants and true community members are distinct from one another. This basic assumption fails in the case of cross-contamination, in which sequences from one sample are detected in other samples (Wright & Vetsigian 2016, Edgar 2016). The amount of cross-contamination appears to vary significantly from study to study in ways that are not entirely understood. decontam is not designed to remove cross-contamination, and MGS studies would benefit from new methods to address cross-contamination. We note a recent promising

## Simple statistical identification and removal of contaminant sequences in marker-gene and metagenomics data

observation that “cross-talk” on Illumina sequences is associated with lower quality index reads, suggesting a simple filtering method to reduce this problem (Wright & Vetsigian 2016).

decontam depends on patterns across samples to identify contaminants, and therefore has low sensitivity for detecting contaminants that are found in few samples. Since very low-prevalence sequences are often uninformative in downstream analyses, it might often be appropriate to combine decontam with a minimum prevalence threshold that removes low-prevalence contaminants that decontam fails to detect. Prevalence thresholds can be applied before or after use of decontam.

## Conclusions

Contaminant removal is a critical but often overlooked step in marker-gene and metagenomics (MGS) quality control (Goodrich *et al.* 2014, Salter *et al.* 2014, Sinha *et al.* 2015, Lauder *et al.* 2016, Kim & Hofstaedter *et al.* 2017). Salter *et al.* and Kim & Hofstaedter *et al.* provide excellent pre-sequencing recommendations that reduce the impact of contamination, which can be complemented by the incorporation of subsequent *in silico* contaminant removal. Here we introduce a simple, flexible, open-source R package – decontam – that recognizes widely reproduced signatures of contaminant DNA sequences, and guides users in the elimination of these sequences from MGS datasets. decontam is well suited for integrating *in silico* contaminant removal into the MGS process: it requires only data that are in most cases already generated during sample preparation, readily fits into existing MGS analysis pipelines, and can be applied to many types of MGS data. Together, our results suggest that decontam can improve the accuracy of biological inferences across a wide variety of MGS studies.

Simple statistical identification and removal of contaminant sequences in marker-gene and metagenomics data

## Methods

### Oral specimen processing

Following extraction of whole genomic DNA using the PowerSoil®-HTP 96 well Soil DNA Isolation Kit (MO BIO Laboratories, Carlsbad, CA, USA), specimens were PCR amplified in 2-4 replicate 75-μL reactions using Golay error-correcting barcoded primers targeting the V4 hypervariable region of the bacterial 16S rRNA gene (Walters *et al.* 2015). Amplicons were purified, DNA-quantitated using the PicoGreen fluorescence-based Quant-iT dsDNA Assay Kit (ThermoFisher catalog no. Q33120), and pooled in equimolar amounts. Following ethanol precipitation and size-selection, the amplicon pool was sequenced in duplicate on two lanes of an Illumina MiSeq v3 flowcell at the W.M. Keck Center for Comparative Functional Genomics (University of Illinois, Urbana-Champaign, USA).

### 16S rRNA Gene Sequence Processing

Files from duplicate sequencing runs were concatenated, demultiplexed using Qiime's `split_libraries_fastq.py` script, and imported into R for quality filtering, inference of sample composition, and sequence table preparation with the `dada2` package (Callahan et al. 2016). The final sequence table consisted of 18,285,750 sequencing reads in 2,420 unique ASVs across 767 samples. Taxonomy was assigned to each sequence using the non-redundant SILVA taxonomic training set ('silva\_nr\_v123\_train\_set.fa', <https://www.arb-silva.de>). Auxiliary taxonomy assignment was performed for comparisons of our dataset and past reports of contaminating 16S rRNA gene sequences (see Generation of Recommended Taxonomic Classification).

### Construction of Feature Table

## Simple statistical identification and removal of contaminant sequences in marker-gene and metagenomics data

The ASV table, taxonomy table, and sample metadata were imported into the phyloseq R package (McMurdie & Holmes, 2013). Samples and taxa were conservatively filtered to include only samples extracted using the same DNA extraction kit, and to remove singleton sequences and ASVs that appeared in only one sample.

## Generation of Recommended Taxonomic Classification

To improve taxonomic classification accuracy for oral genera, we classified sequences a second time using the Human Oral Microbiome Database (HOMD, Chen *et al.* 2011, <http://www.homd.org/>, ‘HOMD\_16S\_rRNA\_RefSeq\_V14.5.fasta’). We then compared SILVA and HOMD classifications at the genus level. For each of 80 sequences on which SILVA and HOMD disagreed, we assigned a recommended genus that best matched genus-level classifications generated by NCBI BLAST.

## Construction of oral and contamination databases

To compare our data to past reports of oral microbes and contaminants, we generated two databases. The first contains confirmed members of the human oral microbiota as evidenced by microscopic visualization in human oral specimens (Brinig *et al.* 2003, Valm *et al.* 2011, Mark Welch *et al.* 2016). These microbial genera are listed with their literature citations in the ‘oral\_database.csv’ file. A second database captured bacterial genera previously reported as contaminants in 16S rRNA gene negative control samples. The list of genera with their literature citations can be found in the ‘contamination\_database.csv’ file. Genera that appeared in both databases were excluded from the contamination database to prevent abundant oral genera that have also been observed as contaminants, like *Haemophilus* and *Streptococcus*, from dominating

## Simple statistical identification and removal of contaminant sequences in marker-gene and metagenomics data

analyses of our data. Note that, although a database derived from oral plaque taxa serves as a reasonable proxy for membership in the oral mucosa, and should exclude contaminants derived from non-oral sites, oral microbes are tissue- and site-specific. Thus, our database may lack a subset of mucosal taxa.

## Construction of oral and contamination databases

The sequencing data from the human oral microbiome are available at the SRA under accession number: Pending. The R markdown analysis scripts and all input data necessary to reproduce the analyses in this paper are available at <https://benjjneb.github.io/DecontamManuscript/>

## Acknowledgments

We thank the study participants for specimen donation, and Dr. Ava Wu and Danielle Drury at the UCSF School of Dentistry for collecting oral mucosa specimens. We thank Les Dethlefsen and members of the Relman Lab for helpful discussions and suggestions. This research was supported by NIH National Institute of Dental and Craniofacial Research grant R01 DE023113 (to D.A.R.) and the Thomas C. and Joan M. Merigan Endowment at Stanford University (D.A.R.).

Simple statistical identification and removal of contaminant sequences in marker-gene and metagenomics data

## References

- Aagaard, K., Ma, J., Antony, K. M., Ganu, R., Petrosino, J., & Versalovic, J. (2014). The placenta harbors a unique microbiome. *Sci Transl Med*, 6(237), 237ra265. doi:10.1126/scitranslmed.3008599
- Adams, R. I., Bateman, A. C., Bik, H. M., & Meadow, J. F. (2015). Microbiota of the indoor environment: a meta-analysis. *Microbiome*, 3, 49. doi:10.1186/s40168-015-0108-3
- Afshinnikoo E, Meydan C, Chowdhury S, Jaroudi D, Boyer C, Bernstein N, Maritz JM, Reeves D, Gandara J, Chhangawala S, Ahsanuddin S. (2015). Geospatial resolution of human and bacterial diversity with city-scale metagenomics. *Cell systems*, 1(1), 72-87. doi:10.1016/j.cels.2015.01.001
- Anantharaman, K., Brown, C. T., Hug, L. A., Sharon, I., Castelle, C. J., Probst, A. J., . . . Banfield, J. F. (2016). Thousands of microbial genomes shed light on interconnected biogeochemical processes in an aquifer system. *Nat Commun*, 7, 13219. doi:10.1038/ncomms13219
- Barton, H. A., Taylor, N. M., Lubbers, B. R., & Pemberton, A. C. (2006). DNA extraction from low-biomass carbonate rock: an improved method with reduced contamination and the low-biomass contaminant database. *J Microbiol Methods*, 66(1), 21-31. doi:10.1016/j.mimet.2005.10.005
- Benjamini Y, Hochberg Y. Controlling the false discovery rate: a practical and powerful approach to multiple testing. *Journal of the royal statistical society. Series B (Methodological)*. 1995 Jan 1:289-300.
- Bik, E. M., Long, C. D., Armitage, G. C., Loomer, P., Emerson, J., Mongodin, E. F., . . . Relman, D. A. (2010). Bacterial diversity in the oral cavity of 10 healthy individuals. *ISME J*, 4(8), 962-974. doi:10.1038/ismej.2010.30
- Bittinger, K., Charlson, E. S., Loy, E., Shirley, D. J., Haas, A. R., Laughlin, A., . . . Bushman, F. D. (2014). Improved characterization of medically relevant fungi in the human respiratory tract using next-generation sequencing. *Genome Biol*, 15(10), 487. doi:10.1186/s13059-014-0487-y
- Brinig, M. M., Lepp, P. W., Ouverney, C. C., Armitage, G. C., & Relman, D. A. (2003). Prevalence of bacteria of division TM7 in human subgingival plaque and their association with disease. *Appl Environ Microbiol*, 69(3), 1687-1694.
- Callahan, B. J., McMurdie, P. J., Rosen, M. J., Han, A. W., Johnson, A. J., & Holmes, S. P. (2016). DADA2: High-resolution sample inference from Illumina amplicon data. *Nat Methods*, 13(7), 581-583. doi:10.1038/nmeth.3869
- Callahan, B. J., DiGiulio, D. B., Goltsman, D. S. A., Sun, C. L., Costello, E. K., Jeganathan, P., . . . Relman, D. A. (2017). Replication and refinement of a vaginal microbial signature of preterm

# Simple statistical identification and removal of contaminant sequences in marker-gene and metagenomics data

birth in two racially distinct cohorts of US women. *Proc Natl Acad Sci USA*, 114(37), 9966-9971. doi:10.1073/pnas.1705899114

Chen, T., Yu, W. H., Izard, J., Baranova, O. V., Lakshmanan, A., & Dewhirst, F. E. (2010). The Human Oral Microbiome Database: a web accessible resource for investigating oral microbe taxonomic and genomic information. Database (Oxford), 2010, baq013. doi:10.1093/database/baq013

Delmont, T. O., & Eren, A. M. (2016). Identifying contamination with advanced visualization and analysis practices: metagenomic approaches for eukaryotic genome assemblies. *PeerJ*, 4, e1839. doi:10.7717/peerj.1839

DiGiulio, D. B., Callahan, B. J., McMurdie, P. J., Costello, E. K., Lyell, D. J., Robaczewska, A., . . . Relman, D. A. (2015). Temporal and spatial variation of the human microbiota during pregnancy. *Proc Natl Acad Sci U S A*, 112(35), 11060-11065. doi:10.1073/pnas.1502875112

Dunn, R. R., Fierer, N., Henley, J. B., Leff, J. W., & Menninger, H. L. (2013). Home life: factors structuring the bacterial diversity found within and between homes. *PLoS One*, 8(5), e64133. doi:10.1371/journal.pone.0064133

Eckburg, P. B., Bik, E. M., Bernstein, C. N., Purdom, E., Dethlefsen, L., Sargent, M., ... & Relman, D. A. (2005). Diversity of the human intestinal microbial flora. *Science*, 308(5728), 1635-1638.

Edgar R. C. (2016) UNCROSS: Filtering of high-frequency cross-talk in 16S amplicon reads. bioRxiv 088666 doi: 10.1101/088666.

Eren, A. M., Borisy, G. G., Huse, S. M., & Mark Welch, J. L. (2014). Oligotyping analysis of the human oral microbiome. *Proc Natl Acad Sci U S A*, 111(28), E2875-2884. doi:10.1073/pnas.1409644111

Flores, G. E., Henley, J. B., & Fierer, N. (2012). A direct PCR approach to accelerate analyses of human-associated microbial communities. *PLoS One*, 7(9), e44563. doi:10.1371/journal.pone.0044563

Fox, G. E., Stackebrandt, E., Hespell, R. B., Gibson, J., Maniloff, J., Dyer, T. A., . . . Woese, C. R. (1980). The phylogeny of prokaryotes. *Science*, 209(4455), 457-463.

Gentleman, R. C., Carey, V. J., Bates, D. M., Bolstad, B., Dettling, M., Dudoit, S., . . . Zhang, J. (2004). Bioconductor: open software development for computational biology and bioinformatics. *Genome Biol*, 5(10), R80. doi:10.1186/gb-2004-5-10-r80

Gill, S. R., Pop, M., Deboy, R. T., Eckburg, P. B., Turnbaugh, P. J., Samuel, B. S., . . . Nelson, K. E. (2006). Metagenomic analysis of the human distal gut microbiome. *Science*, 312(5778), 1355-1359. doi:10.1126/science.1124234



# Simple statistical identification and removal of contaminant sequences in marker-gene and metagenomics data

Glassing, A., Dowd, S. E., Galandiuk, S., Davis, B., & Chiodini, R. J. (2016). Inherent bacterial DNA contamination of extraction and sequencing reagents may affect interpretation of microbiota in low bacterial biomass samples. *Gut Pathog*, 8, 24. doi:10.1186/s13099-016-0103-7

Goodrich, J. K., Di Rienzi, S. C., Poole, A. C., Koren, O., Walters, W. A., Caporaso, J. G., . . . Ley, R. E. (2014). Conducting a microbiome study. *Cell*, 158(2), 250-262. doi:10.1016/j.cell.2014.06.037

Herrera, A., & Cockell, C. S. (2007). Exploring microbial diversity in volcanic environments: a review of methods in DNA extraction. *J Microbiol Methods*, 70(1), 1-12. doi:10.1016/j.mimet.2007.04.005

Jervis-Bardy, J., Leong, L. E., Marri, S., Smith, R. J., Choo, J. M., Smith-Vaughan, H. C., . . . Marsh, R. L. (2015). Deriving accurate microbiota profiles from human samples with low bacterial content through post-sequencing processing of Illumina MiSeq data. *Microbiome*, 3, 19. doi:10.1186/s40168-015-0083-8

Jousselin, E., Clamens, A. L., Galan, M., Bernard, M., Maman, S., Gschloessl, B., . . . Coeur d'acier, A. (2016). Assessment of a 16S rRNA amplicon Illumina sequencing procedure for studying the microbiome of a symbiont-rich aphid genus. *Mol Ecol Resour*, 16(3), 628-640. doi:10.1111/1755-0998.12478

Kennedy, N. A., Walker, A. W., Berry, S. H., Duncan, S. H., Farquarson, F. M., Louis, P., . . . Hold, G. L. (2014). The impact of different DNA extraction kits and laboratories upon the assessment of human gut microbiota composition by 16S rRNA gene sequencing. *PLoS One*, 9(2), e88982. doi:10.1371/journal.pone.0088982

Kim, D., Hofstaedter, C. E., Zhao, C., Mattei, L., Tanes, C., Clarke, E., . . . Bittinger, K. (2017). Optimizing methods and dodging pitfalls in microbiome research. *Microbiome*, 5(1), 52. doi:10.1186/s40168-017-0267-5

Kircher, M., Sawyer, S., & Meyer, M. (2012). Double indexing overcomes inaccuracies in multiplex sequencing on the Illumina platform. *Nucleic Acids Res*, 40(1), e3. doi:10.1093/nar/gkr771

Kitchin, P. A., Szotyori, Z., Fromholz, C., & Almond, N. (1990). Avoidance of PCR false positives [corrected]. *Nature*, 344(6263), 201. doi:10.1038/344201a0

Knights, D., Kuczynski, J., Charlson, E. S., Zaneveld, J., Mozer, M. C., Collman, R. G., . . . Kelley, S. T. (2011). Bayesian community-wide culture-independent microbial source tracking. *Nat Methods*, 8(9), 761-763. doi:10.1038/nmeth.1650

Koren, O., Spor, A., Felin, J., Fak, F., Stombaugh, J., Tremaroli, V., . . . Backhed, F. (2011). Human oral, gut, and plaque microbiota in patients with atherosclerosis. *Proc Natl Acad Sci U S A*, 108 Suppl 1, 4592-4598. doi:10.1073/pnas.1011383107

# Simple statistical identification and removal of contaminant sequences in marker-gene and metagenomics data

Lauder, A. P., Roche, A. M., Sherrill-Mix, S., Bailey, A., Laughlin, A. L., Bittinger, K., . . . Bushman, F. D. (2016). Comparison of placenta samples with contamination controls does not provide evidence for a distinct placenta microbiota. *Microbiome*, 4(1), 29. doi:10.1186/s40168-016-0172-3

Lazarevic, V., Gaia, N., Girard, M., & Schrenzel, J. (2016). Decontamination of 16S rRNA gene amplicon sequence datasets based on bacterial load assessment by qPCR. *BMC Microbiol*, 16, 73. doi:10.1186/s12866-016-0689-4

Lusk, R. W. (2014). Diverse and widespread contamination evident in the unmapped depths of high throughput sequencing data. *PLoS One*, 9(10), e110808. doi:10.1371/journal.pone.0110808

Mark Welch, J. L., Rossetti, B. J., Rieken, C. W., Dewhirst, F. E., & Borisy, G. G. (2016). Biogeography of a human oral microbiome at the micron scale. *Proc Natl Acad Sci U S A*, 113(6), E791-800. doi:10.1073/pnas.1522149113

McMurdie, P. J., & Holmes, S. (2013). phyloseq: an R package for reproducible interactive analysis and graphics of microbiome census data. *PLoS One*, 8(4), e61217. doi:10.1371/journal.pone.0061217

Meadow, J. F., Altrichter, A. E., Bateman, A. C., Stenson, J., Brown, G. Z., Green, J. L., & Bohannan, B. J. (2015). Humans differ in their personal microbial cloud. *PeerJ*, 3, e1258. doi:10.7717/peerj.1258

Patel, P., Garson, J. A., Tettmar, K. I., Ancliff, S., McDonald, C., Pitt, T., . . . Tedder, R. S. (2012). Development of an ethidium monoazide-enhanced internally controlled universal 16S rDNA real-time polymerase chain reaction assay for detection of bacterial contamination in platelet concentrates. *Transfusion*, 52(7), 1423-1432. doi:10.1111/j.1537-2995.2011.03484.x

Perez-Muñoz, M. E., Arrieta, M. C., Ramer-Tait, A. E., & Walter, J. (2017). A critical assessment of the “sterile womb” and “in utero colonization” hypotheses: implications for research on the pioneer infant microbiome. *Microbiome*, 5(1), 48.

Rand, K. H., & Houck, H. (1990). Taq polymerase contains bacterial DNA of unknown origin. *Mol Cell Probes*, 4(6), 445-450.

Ravel, J., Gajer, P., Abdo, Z., Schneider, G. M., Koenig, S. S., McCulle, S. L., . . . Forney, L. J. (2011). Vaginal microbiome of reproductive-age women. *Proc Natl Acad Sci U S A*, 108 Suppl 1, 4680-4687. doi:10.1073/pnas.1002611107

Riesenfeld, C. S., Schloss, P. D., & Handelsman, J. (2004). Metagenomics: genomic analysis of microbial communities. *Annu Rev Genet*, 38, 525-552. doi:10.1146/annurev.genet.38.072902.091216

# Simple statistical identification and removal of contaminant sequences in marker-gene and metagenomics data

Riley, D. R., Sieber, K. B., Robinson, K. M., White, J. R., Ganesan, A., Nourbakhsh, S., & Dunning Hotopp, J. C. (2013). Bacteria-human somatic cell lateral gene transfer is enriched in cancer samples. *PLoS Comput Biol*, 9(6), e1003107. doi:10.1371/journal.pcbi.1003107

Salter, S. J., Cox, M. J., Turek, E. M., Calus, S. T., Cookson, W. O., Moffatt, M. F., . . . Walker, A. W. (2014). Reagent and laboratory contamination can critically impact sequence-based microbiome analyses. *BMC Biol*, 12, 87. doi:10.1186/s12915-014-0087-z

Segal, L. N., Alekseyenko, A. V., Clemente, J. C., Kulkarni, R., Wu, B., Gao, Z., . . . Weiden, M. D. (2013). Enrichment of lung microbiome with supraglottic taxa is associated with increased pulmonary inflammation. *Microbiome*, 1(1), 19. doi:10.1186/2049-2618-1-19

Turnbaugh, P. J., Hamady, M., Yatsunenko, T., Cantarel, B. L., Duncan, A., Ley, R. E., . . . Gordon, J. I. (2009). A core gut microbiome in obese and lean twins. *Nature*, 457(7228), 480-484. doi:10.1038/nature07540

Valm, A. M., Mark Welch, J. L., Rieken, C. W., Hasegawa, Y., Sogin, M. L., Oldenbourg, R., . . . Borisy, G. G. (2011). Systems-level analysis of microbial community organization through combinatorial labeling and spectral imaging. *Proc Natl Acad Sci U S A*, 108(10), 4152-4157. doi:10.1073/pnas.1101134108

Walters, W., Hyde, E. R., Berg-Lyons, D., Ackermann, G., Humphrey, G., Parada, A., . . . Knight, R. (2016). Improved Bacterial 16S rRNA Gene (V4 and V4-5) and Fungal Internal Transcribed Spacer Marker Gene Primers for Microbial Community Surveys. *mSystems*, 1(1). doi:10.1128/mSystems.00009-15

Willner, D., Daly, J., Whiley, D., Grimwood, K., Wainwright, C. E., & Hugenholtz, P. (2012). Comparison of DNA extraction methods for microbial community profiling with an application to pediatric bronchoalveolar lavage samples. *PLoS One*, 7(4), e34605. doi:10.1371/journal.pone.0034605

Wright ES, Vetsigian KH. (2016). Quality filtering of Illumina index reads mitigates sample cross-talk. *BMC genomics* 17(1): 876.

Zijng, V., van Leeuwen, M. B., Degener, J. E., Abbas, F., Thurnheer, T., Gmur, R., & Harmsen, H. J. (2010). Oral biofilm architecture on natural teeth. *PLoS One*, 5(2), e9321. doi:10.1371/journal.pone.0009321

# Simple statistical identification and removal of contaminant sequences in marker-gene and metagenomics data

## Supplement

| #  | Id     | Genus                  | P     | #  | Id     | Genus                      | P     |
|----|--------|------------------------|-------|----|--------|----------------------------|-------|
| 1  | Seq47  | <i>Abiotrophia</i>     | 1.000 | 18 | Seq75  | <i>Granulicatella</i>      | 0.999 |
| 2  | Seq122 | <i>Abiotrophia</i>     | 1.000 | 19 | Seq76  | <i>Granulicatella</i>      | 1.000 |
| 3  | Seq159 | <i>Atopobium</i>       | 0.998 | 20 | Seq233 | <i>Granulicatella</i>      | 0.918 |
| 4  | Seq182 | <i>Atopobium</i>       | 1.000 | 21 | Seq77  | <i>Lachnoanaerobaculum</i> | 1.000 |
| 5  | Seq217 | <i>Atopobium</i>       | 1.000 | 22 | Seq154 | <i>Lachnoanaerobaculum</i> | 1.000 |
| 6  | Seq224 | <i>Atopobium</i>       | 0.993 | 23 | Seq191 | <i>Megasphaera</i>         | 0.999 |
| 7  | Seq104 | <i>Cardiobacterium</i> | 1.000 | 24 | Seq94  | <i>Oribacterium</i>        | 1.000 |
| 8  | Seq203 | <i>Cardiobacterium</i> | 0.999 | 25 | Seq256 | <i>Oribacterium</i>        | 0.991 |
| 9  | Seq337 | <i>Cardiobacterium</i> | 0.962 | 26 | Seq302 | <i>Oribacterium</i>        | 0.977 |
| 10 | Seq255 | <i>Comamonas</i>       | 0.960 | 27 | Seq309 | <i>Oribacterium</i>        | 0.986 |
| 11 | Seq145 | <i>Dialister</i>       | 0.979 | 28 | Seq251 | <i>Eubacterium</i>         | 0.999 |
| 12 | Seq229 | <i>Dialister</i>       | 0.958 | 29 | Seq284 | <i>Peptococcus</i>         | 0.997 |
| 13 | Seq232 | <i>Eubacterium</i>     | 1.000 | 30 | Seq131 | <i>Peptostreptococcus</i>  | 1.000 |
| 14 | Seq382 | <i>Eubacterium</i>     | 0.958 | 31 | Seq129 | <i>Solobacterium</i>       | 1.000 |
| 15 | Seq459 | <i>Eubacterium</i>     | 0.958 | 32 | Seq164 | <i>Granulicatella</i>      | 0.977 |
| 16 | Seq13  | <i>Granulicatella</i>  | 1.000 | 33 | Seq820 | <i>Delftia</i>             | 0.937 |
| 17 | Seq22  | <i>Granulicatella</i>  | 0.981 |    |        |                            |       |

**Table S1:** Taxonomic classifications and assigned probabilities (P) of ASVs that decontam identified as oral sequences using the ‘combined’ method, but whose taxonomic classifications belong to genera previously reported as contaminants. Sequences are named by their abundance in the dataset, i.e. Seq47 is the 47<sup>th</sup> most abundant sequence in the oral mucosa dataset.

# Simple statistical identification and removal of contaminant sequences in marker-gene and metagenomics data

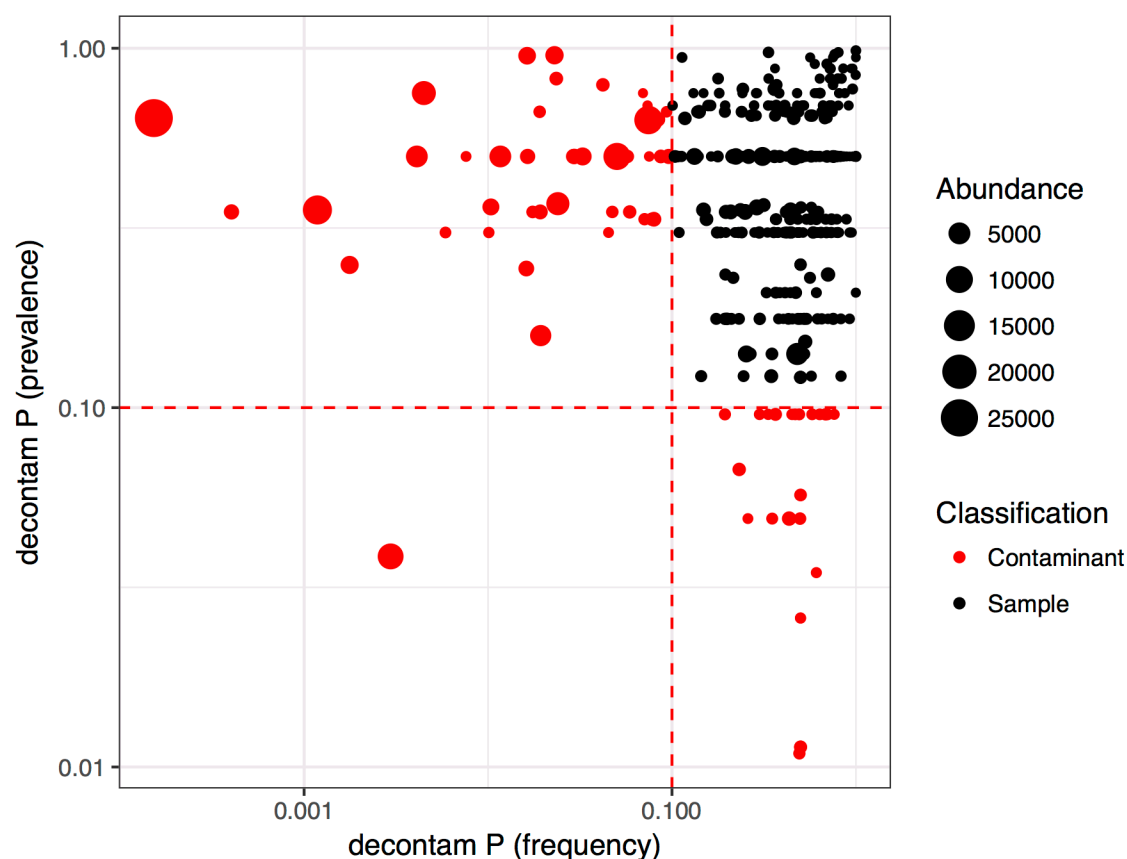

**Figure S1. Classification of contaminant sequences in the Salter *et al.* 16S rRNA data by the frequency and prevalence approaches.** Each ASV was tested by the frequency and prevalence approaches, and the probability for each is shown here on the x- and y-axes, respectively. Size is scaled by the abundance (total number of reads) of the ASV. Dashed lines indicate the  $P^*=0.1$  default classification threshold. The frequency approach was more powerful in this dataset, especially amongst highly abundant contaminants, but the prevalence approach identified additional contaminants missed by the frequency approach.

# Simple statistical identification and removal of contaminant sequences in marker-gene and metagenomics data

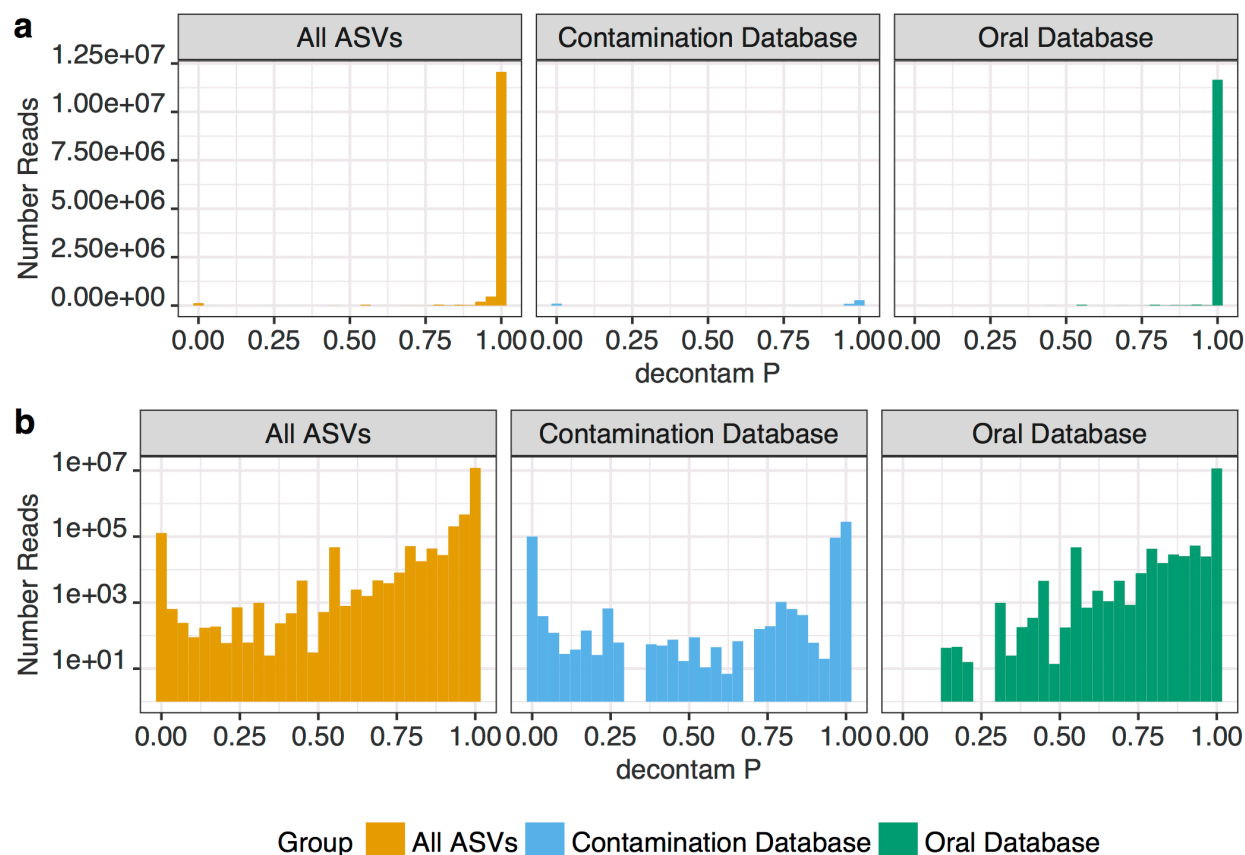

**Figure S2. Probability distributions of sequencing reads in an oral dataset (also see Figure 2).** Probabilities for amplicon sequence variants (ASVs) were computed by using the “combined” method of the *isContaminant* function in the decontam R package. Untransformed sequencing read counts (a) and log-transformed sequencing read counts (b) are plotted for all ASVs present in two or more samples (orange), ASVs from genera previously observed as contaminants in negative control samples (blue, Methods) and ASVs from genera known to be members of human oral samples (green, Methods).
